# Supplementary material
Source: Research Square preprint supplement (doi:10.21203/rs.3.rs-9130235/v1)
Supplement: Supplementary file 1 [file fa2725c4b682767ab2de3f5a.docx]

**Fig. 2**

Kaplan-Meier curve for Overall Survival based on surgical treatment.

**
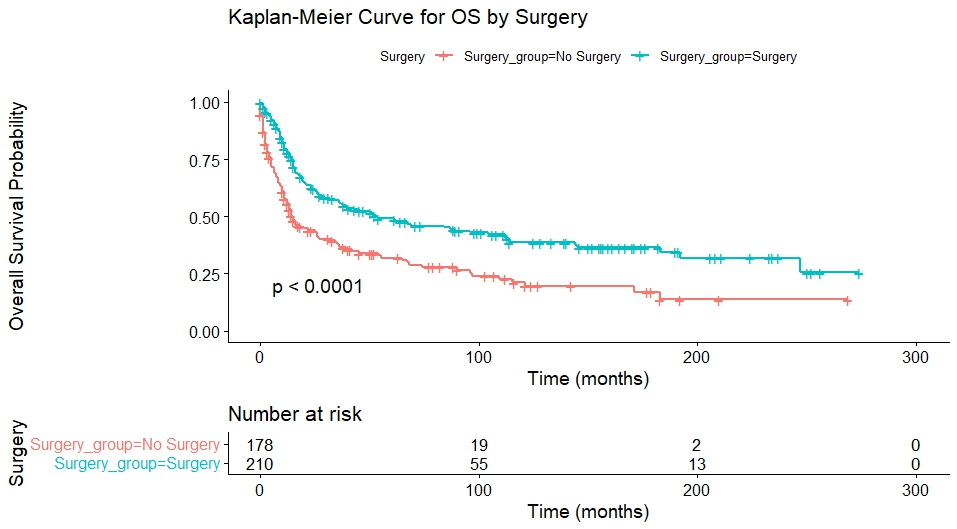
**

**Fig. 3**

Kaplan-Meier curve for Overall Survival based on adjuvant radiotherapy.

**
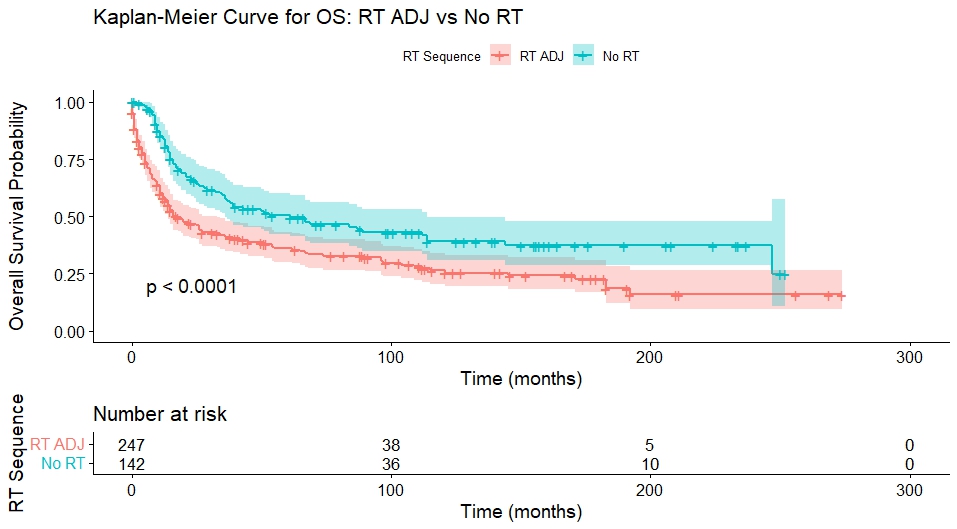
**

**Fig.4**

Kaplan-Meier curve for Overall Survival based on radiotherapy treatment.

**
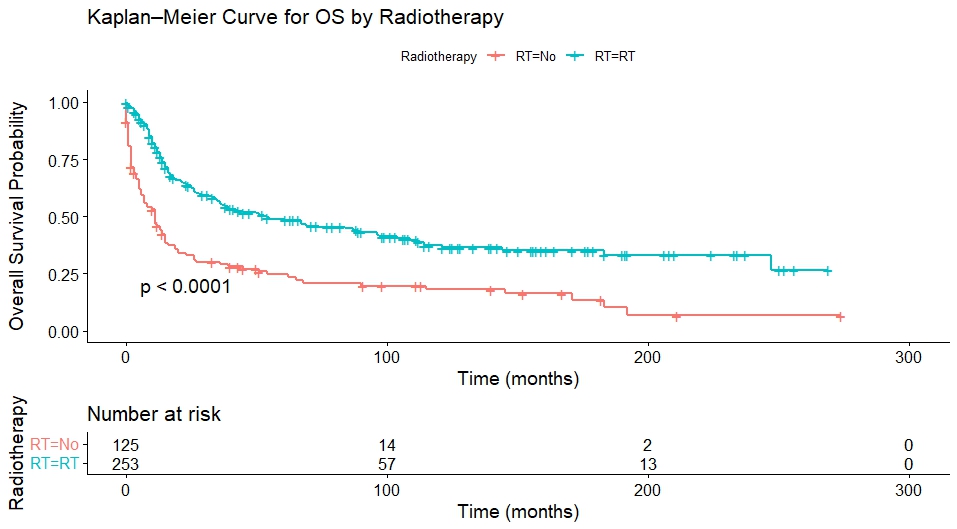
**

**Fig. 5**

Kaplan-Meier curve for Overall Survival based on marital status.

**
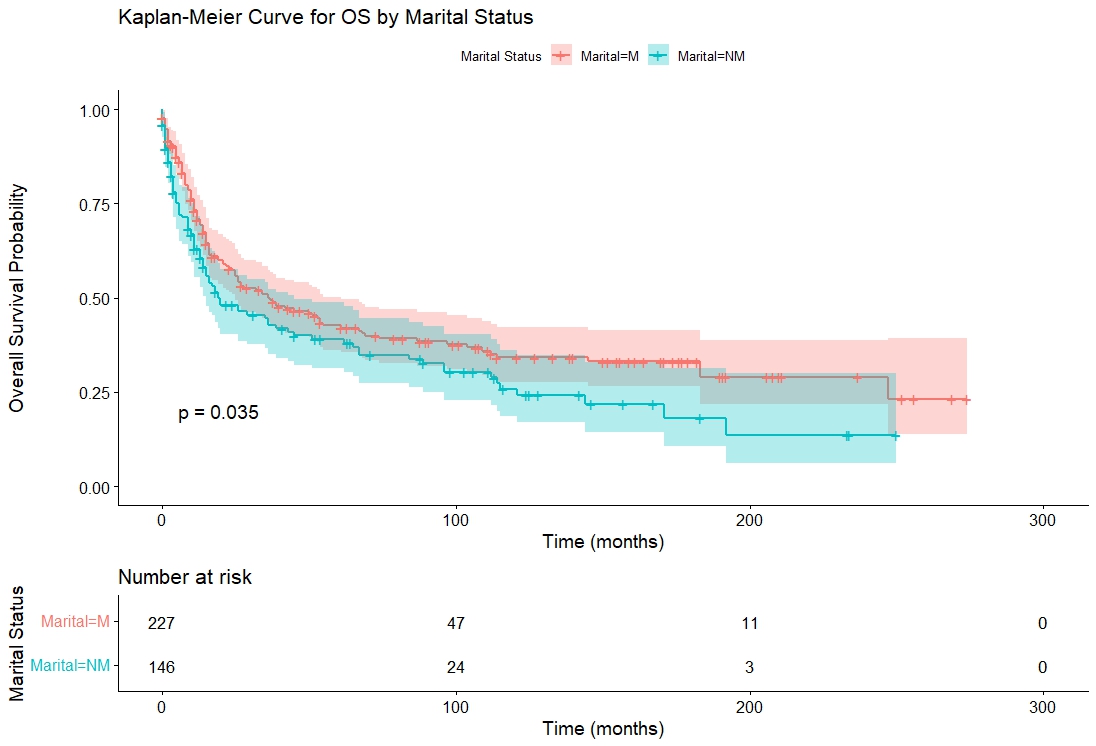
**

**Fig. 6**

Kaplan-Meier curve for Overall Survival based on grade (high grade vs low grade tumors).

**
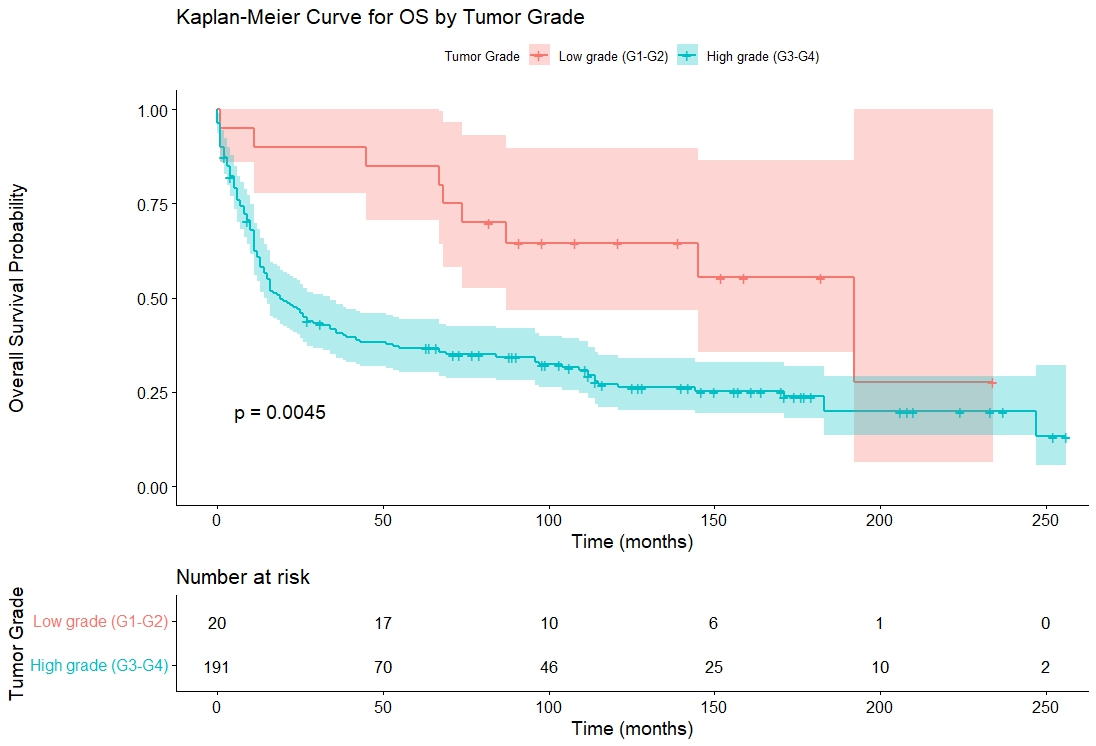
**

**Fig. 7**

Kaplan-Meier curve for Overall Survival based on chemotherapy treatment.

**
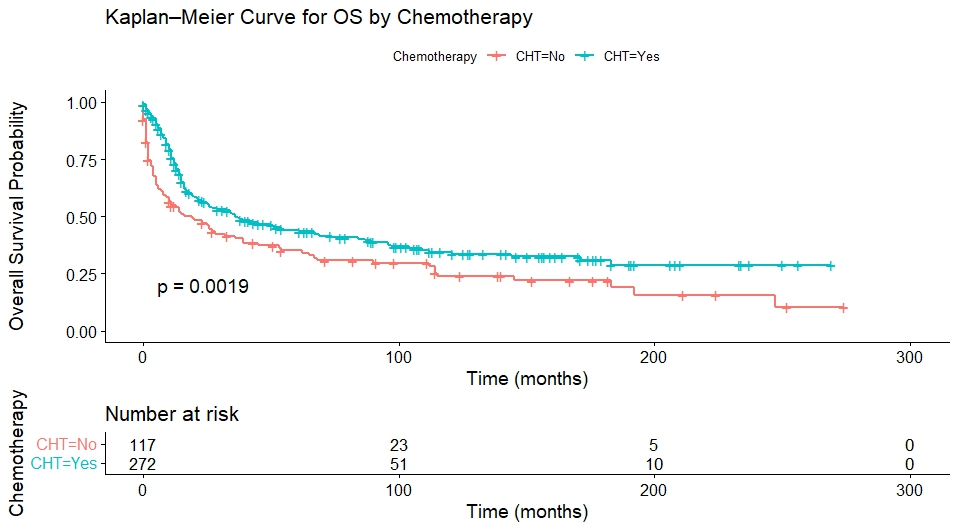
**

**Fig. 8**

Kaplan-Meier curve for Overall Survival based on adjuvant chemotherapy.

**
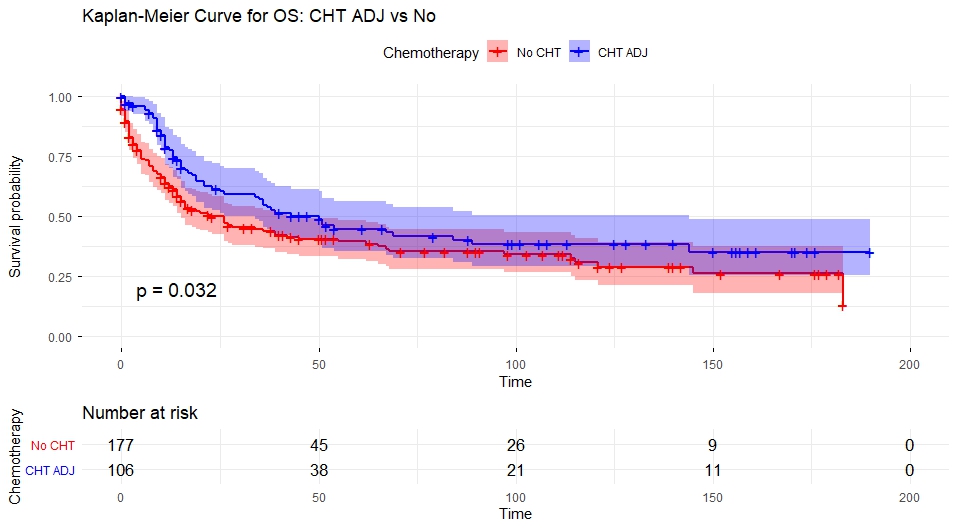
**

**Fig. 9**

Kaplan-Meier curve for Disease-Specific Survival based on surgical treatment.

**
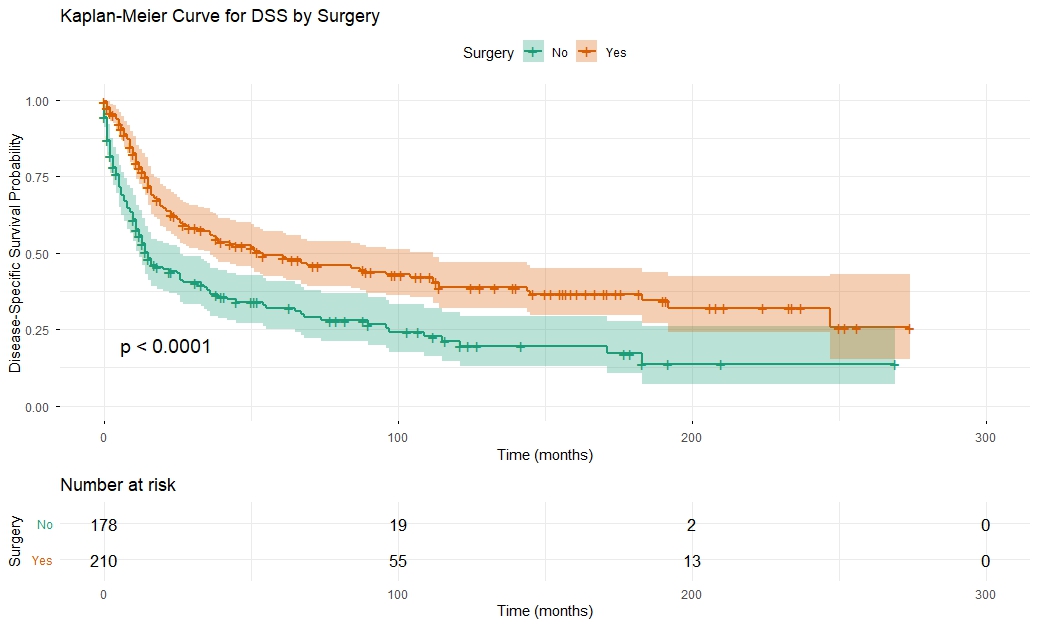
**

**Fig. 10**

Kaplan-Meier curve for Disease-Specific Survival based on radiotherapy treatment.

**
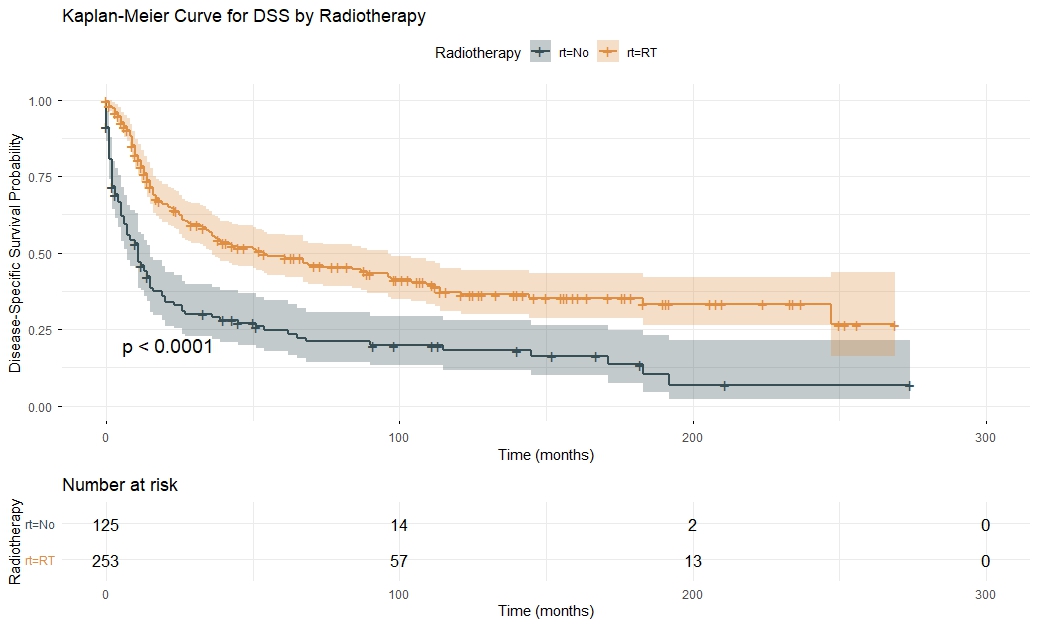
**

**Fig. 11**

Kaplan-Meier curve for Disease-Specific Survival based on adjuvant radiotherapy.

**
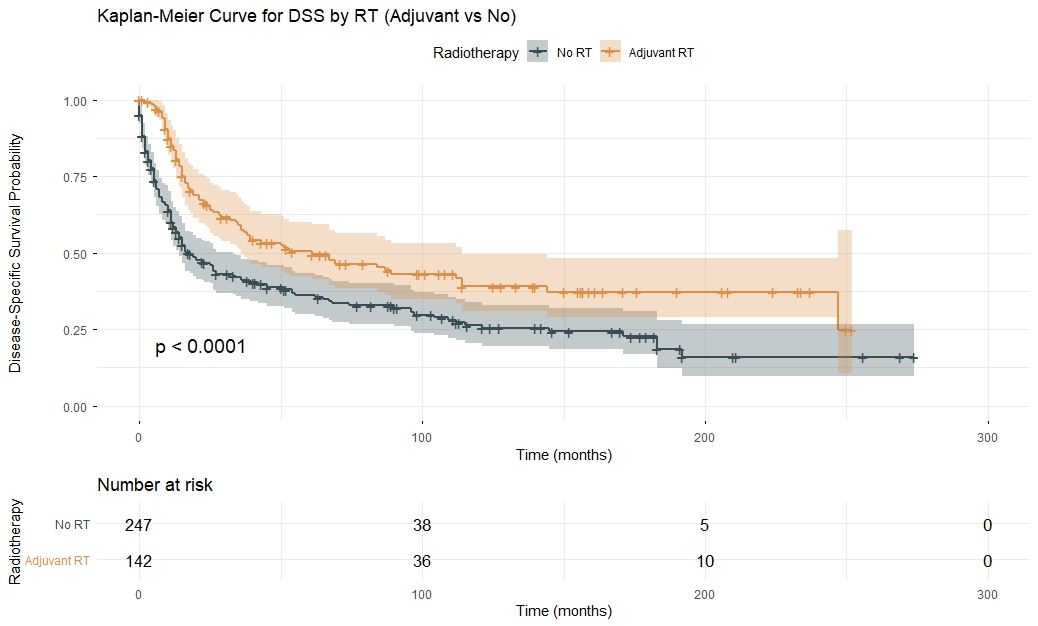
**

**Fig. 12**

Kaplan-Meier curve for Disease-Specific Survival based on chemotherapy treatment.

**
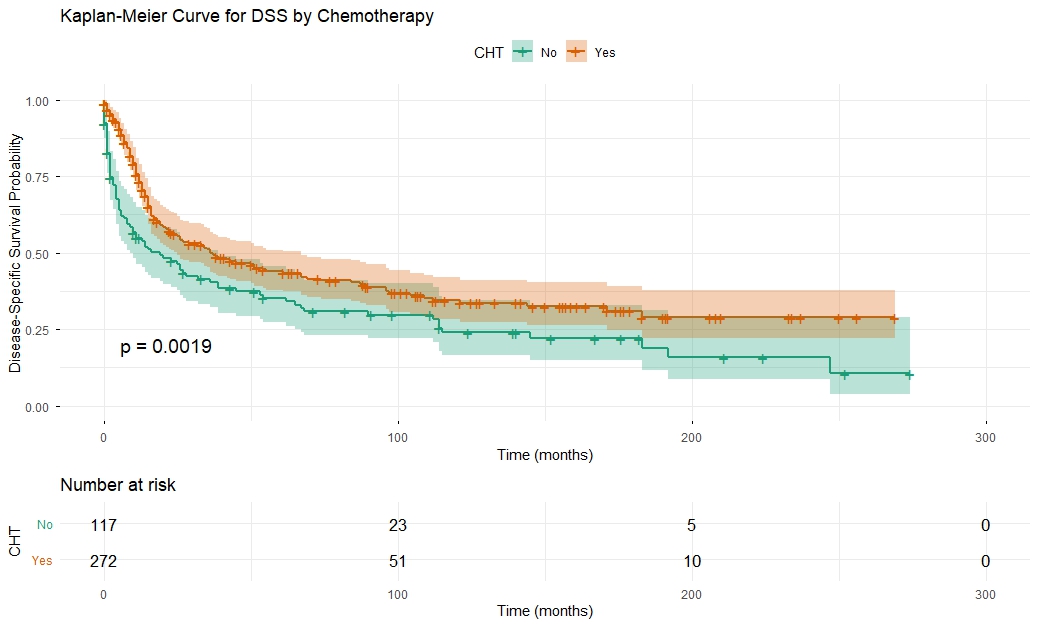
**

**Figure 13.**

Kaplan-Meier curve for Overall survival based on surgical treatment type.


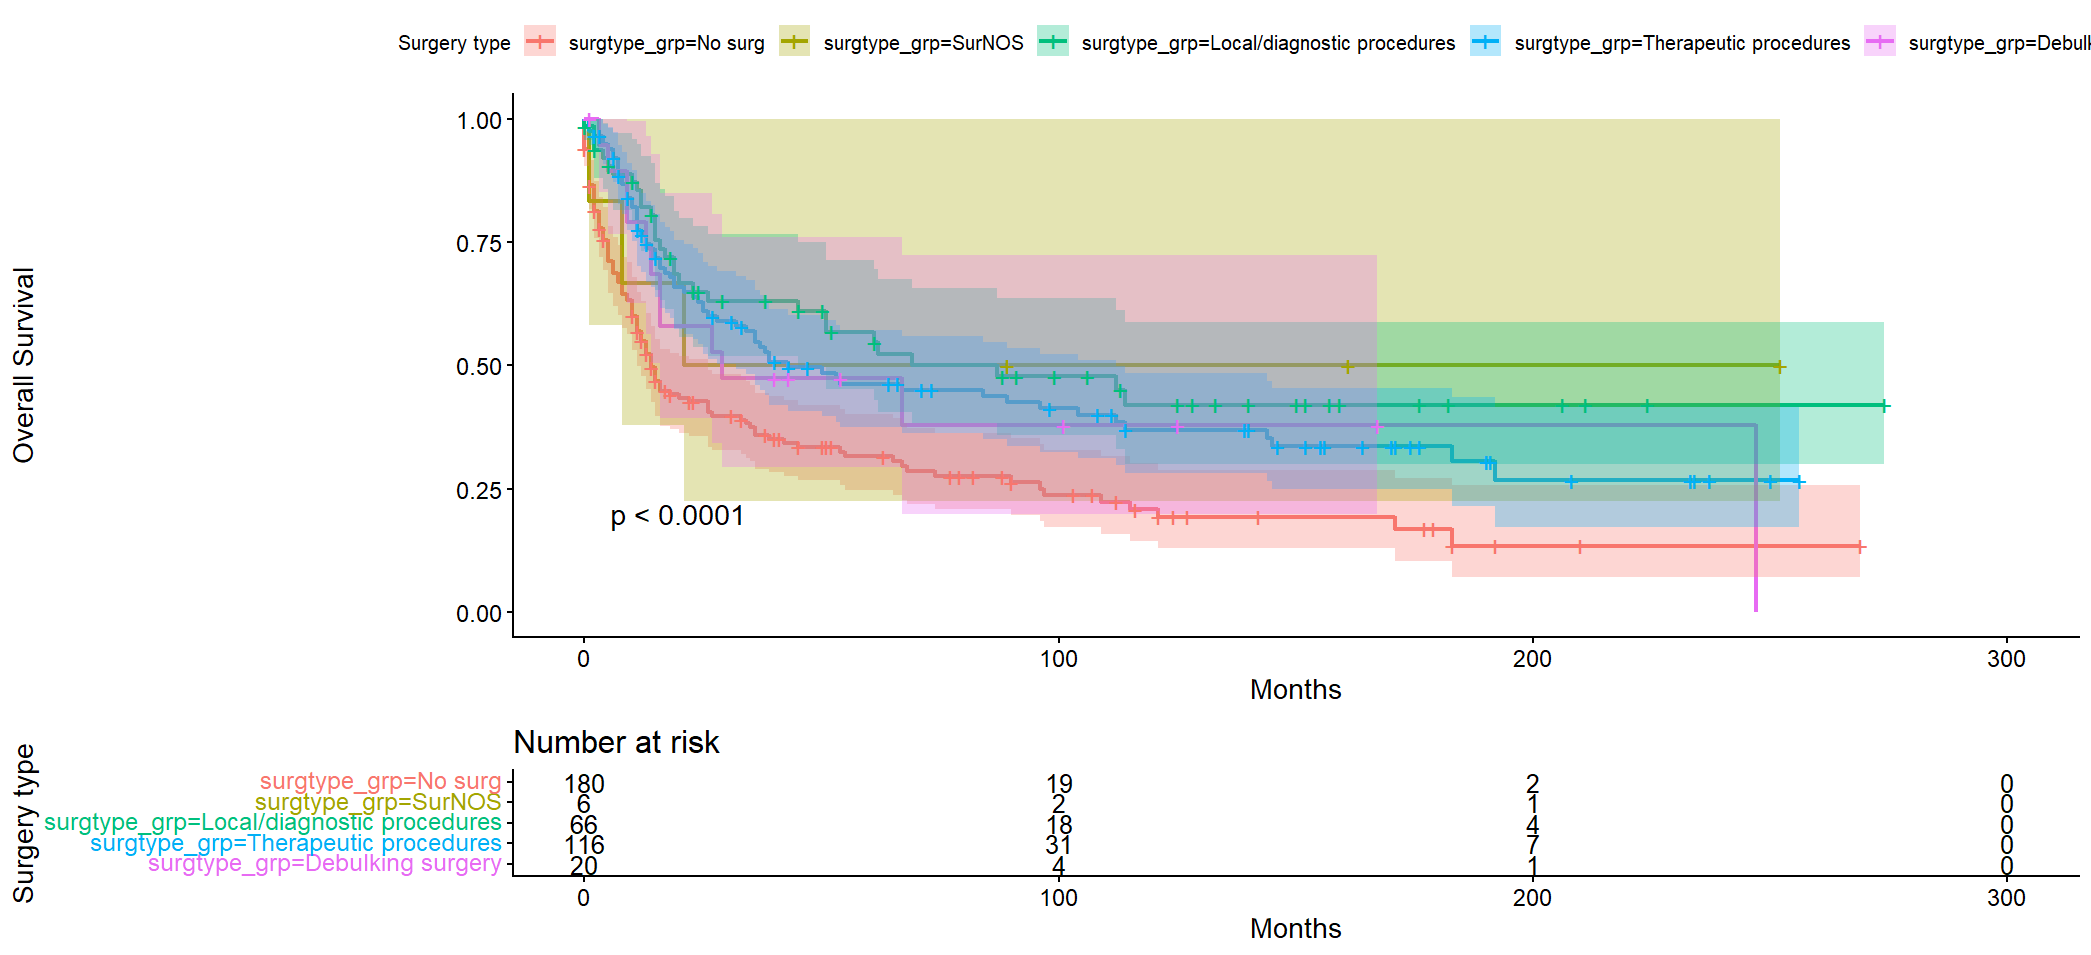


**Figure 14.**

Kaplan-Meier curve for Disease-Specific Survival based on surgical treatment type.


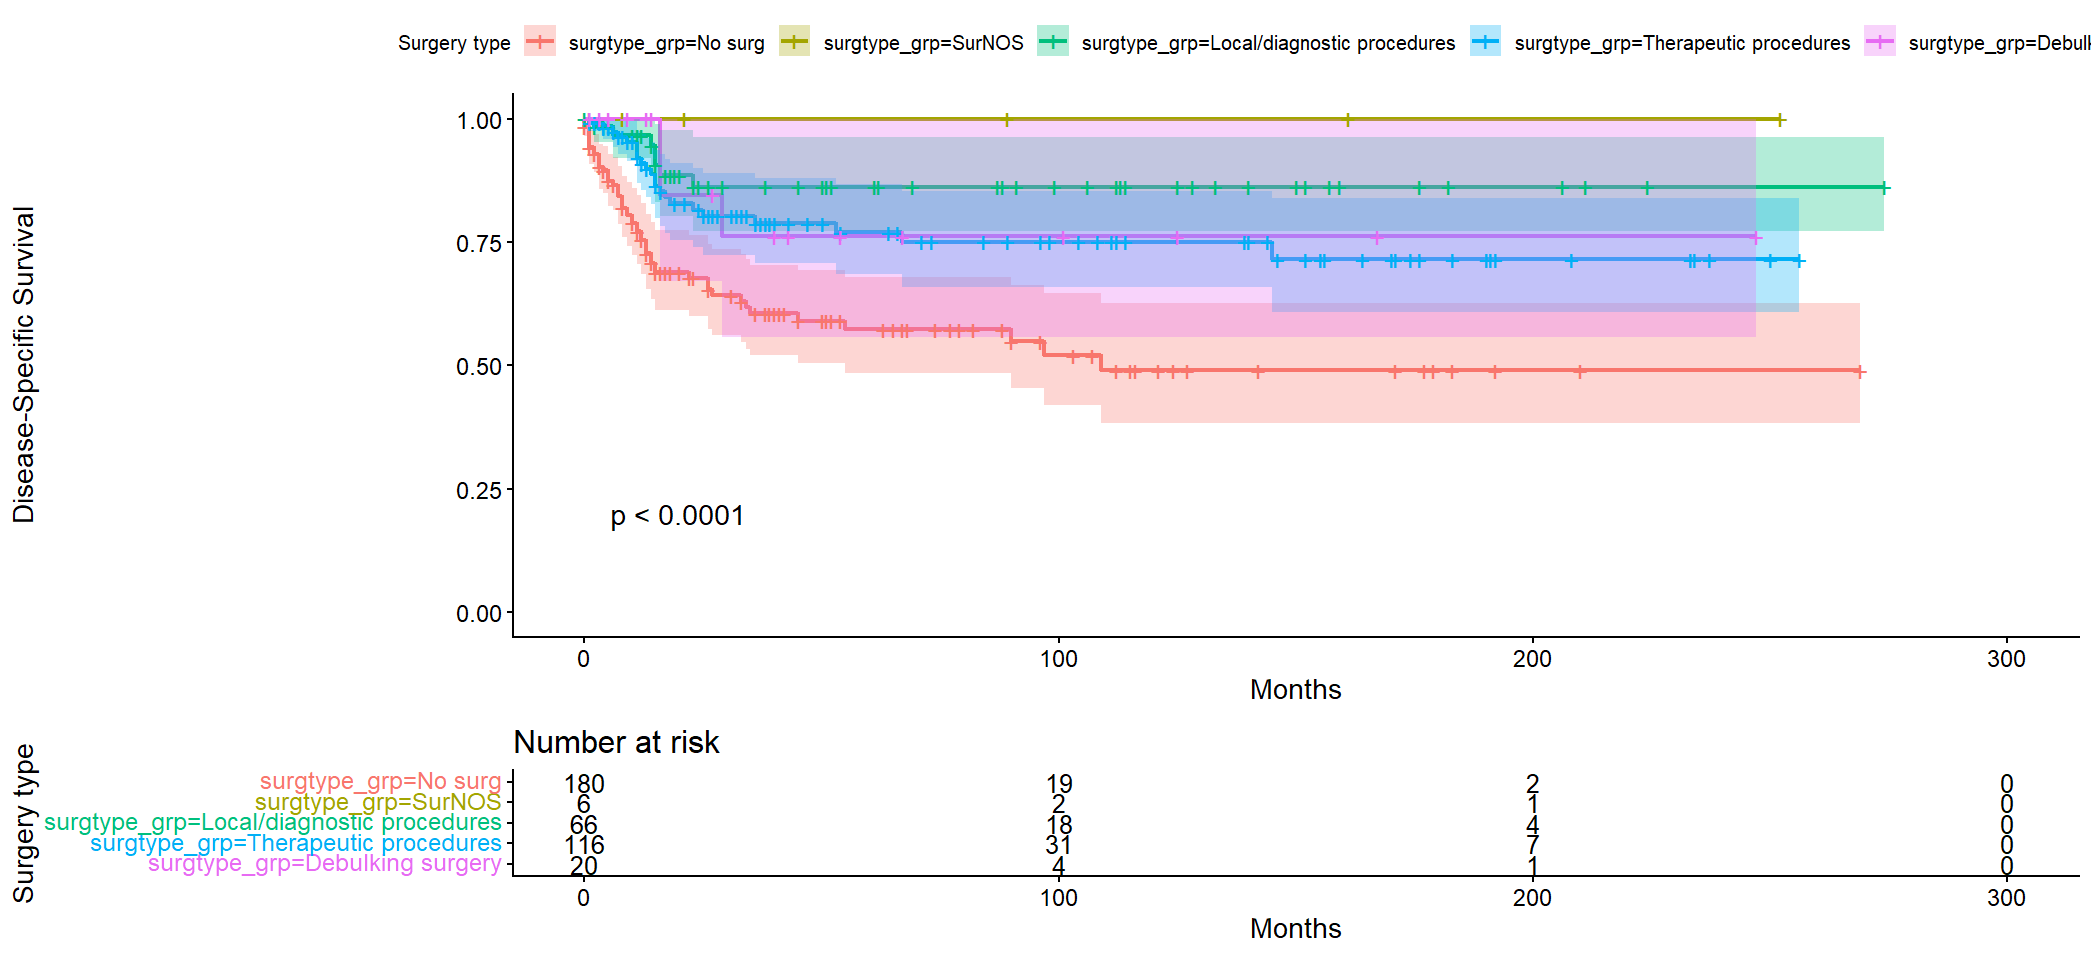


**Figure 15.**

Kaplan-Meier curve for Overall Survival based on histology type.


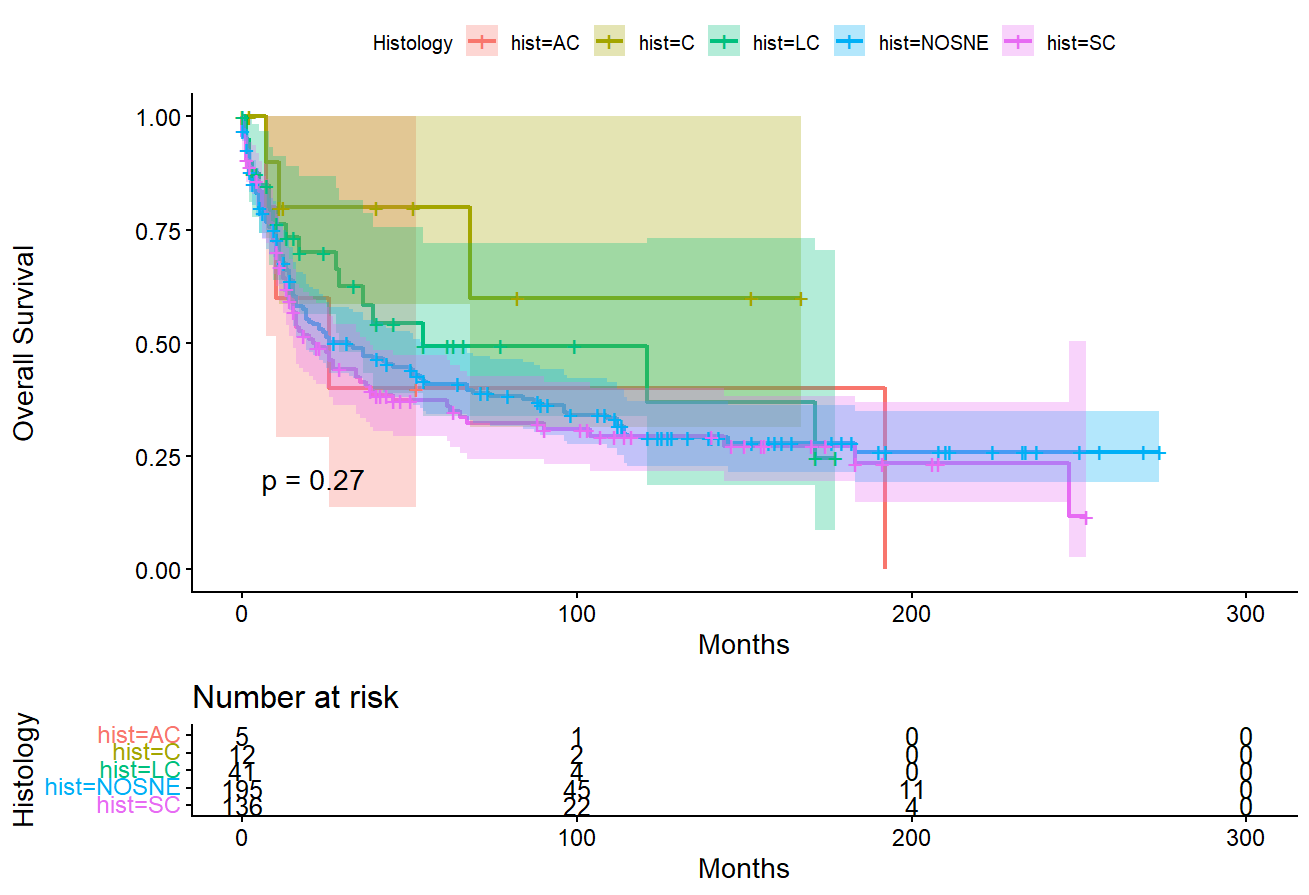


**Figure 16.**

Kaplan-Meier curve for Disease-Specific Survival based on histology type.


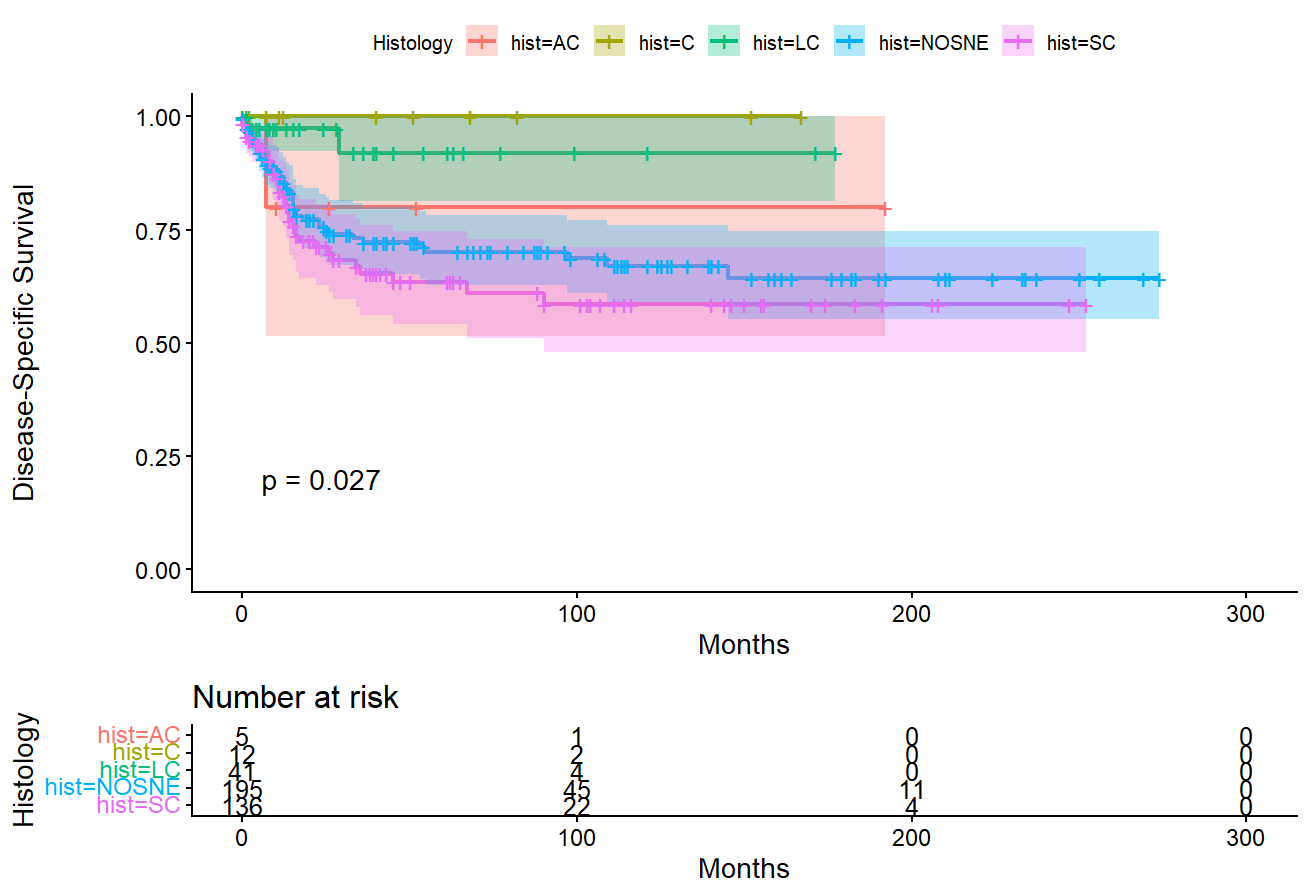


**Figure 17.**

Kaplan-Meier curve for Overall survival based on multimodal treatment type.


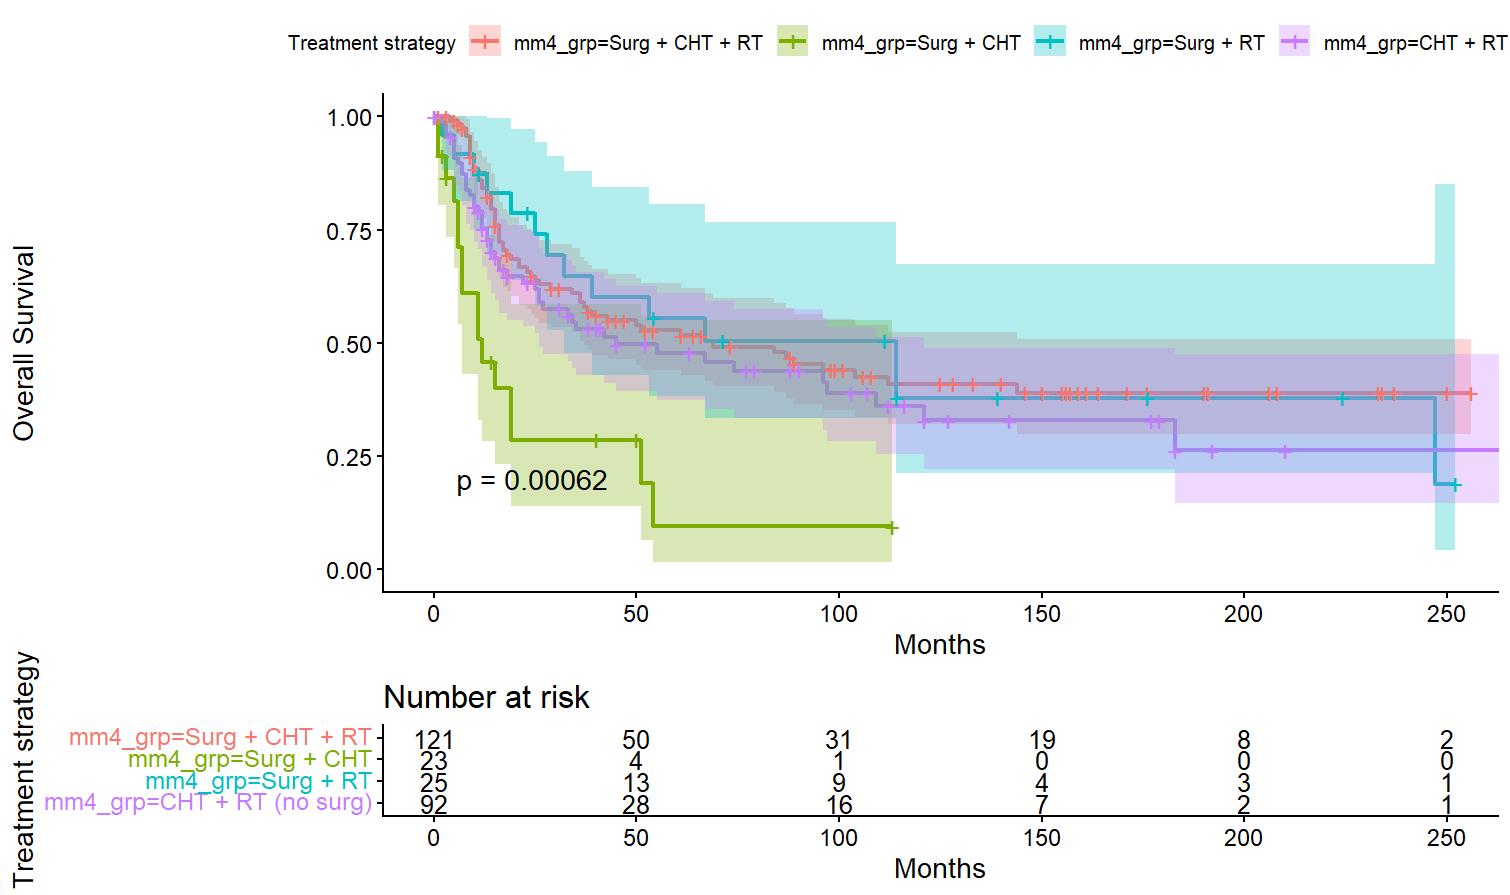


**Figure 18.**

Kaplan-Meier curve for Disease-specific Survival based on multimodal treatment type.

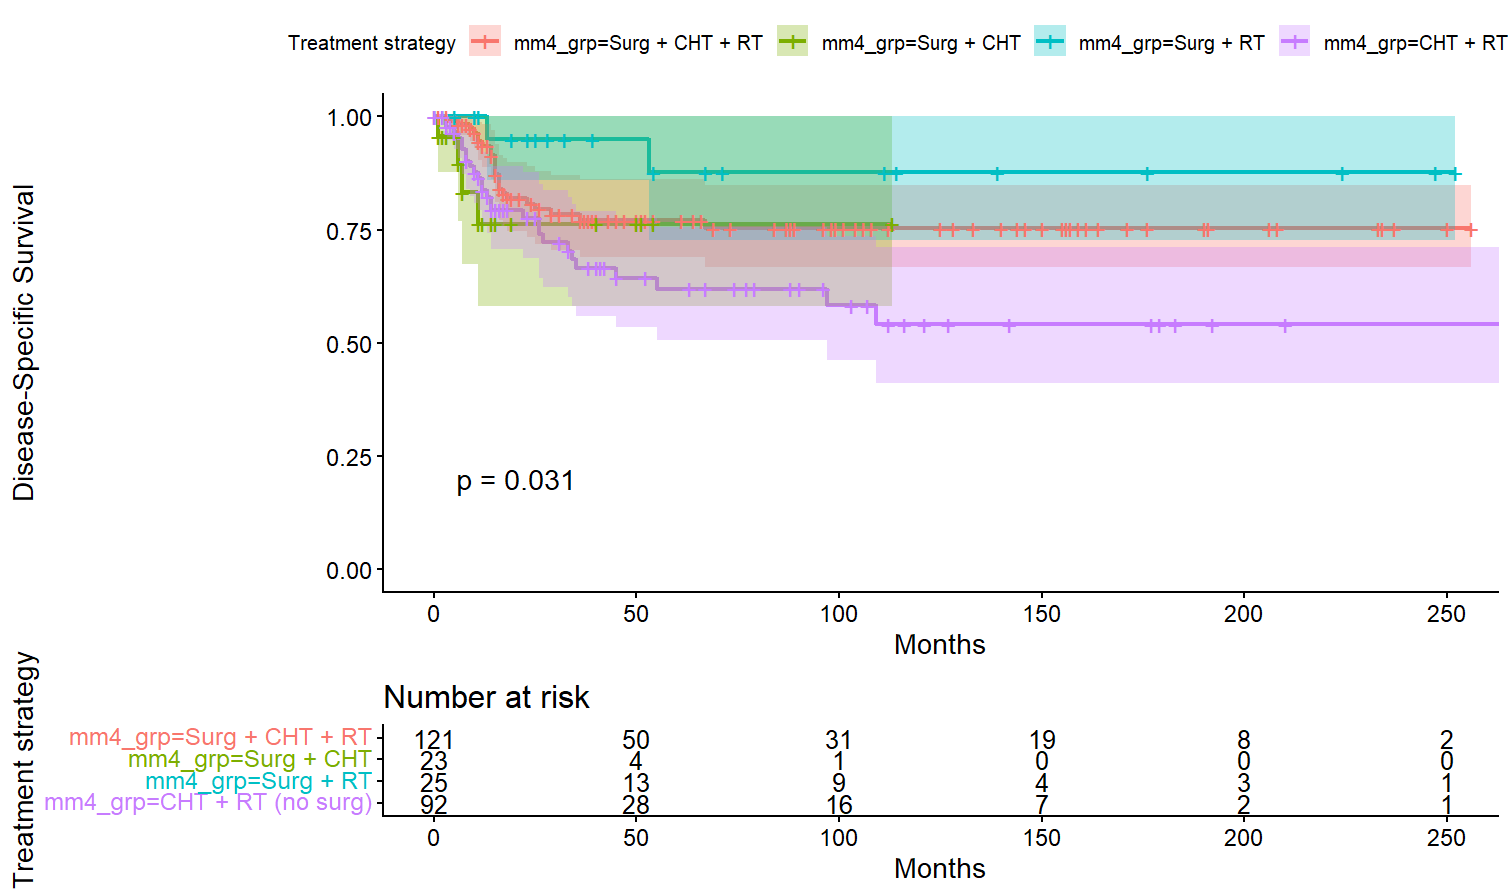


**Table 3.**

Univariate analysis of multimodal treatment strategies for Overall Survival.

| Treatment modalities | | n | Events | HR (95% CI) | p value |
| --- | --- | --- | --- | --- | --- |
| Surgery + RT vs Surgery alone | | 206 | 114 | 0.58 (0.39-0.85) | 0.005 |
| Surgery + adjuvant RT vs Surgery alone | | 200 | 112 | 0.67 (0.45-0.98) | 0.040 |
| Surgery + CHT vs Surgery alone | | 210 | 115 | 0.96 (0.65-1.42) | 0.84 |
| Surgery + adjuvant CHT vs Surgery alone | | 141 |  | 0.96 | 0.80† |
| Four-group multimodal strategy | | 261 | 138 |  | 0.005‡ |
|  | Surgery + CHT vs Surgery + RT |  |  | 3.09 (1.50-6.38) | 0.002 |
|  | Surgery + CHT + RT vs Surgery + RT |  |  | 1.01 (0.57-1.82) | 0.96 |
|  | CHT + RT (no surgery) vs Surgery + RT |  |  | 1.26 (0.69-2.30) | 0.44 |

HRs derived from univariate Cox proportional hazards models.

† Log-rank p value from Kaplan–Meier analysis.

‡ Global likelihood ratio test for multilevel variable.

**Table 4.**

Univariate analysis of multimodal treatment strategies for Disease-specific Survival.

| Treatment modalities | | n | Events | HR (95% CI) | p value |
| --- | --- | --- | --- | --- | --- |
| Surgery + RT vs Surgery alone | | 206 | 34 | 0.83 (0.39-1.78) | 0.63 |
| Surgery + adjuvant RT vs Surgery alone | | 200 | 34 | 1.02 (0.48-2.19) | 0.96 |
| Surgery + CHT vs Surgery alone | | 210 | 34 | 1.76 (0.76-4.04) | 0.19 |
| Surgery + adjuvant CHT vs Surgery alone | | 141 | 21 | 1.43 (0.52-3.90) | 0.49 |
| Four-group multimodal strategy | | 261 | 56 |  | 0.02‡ |
|  | Surgery + CHT vs Surgery + RT |  |  | 1.80 (0.62-5.23) | 0.28 |
|  | Surgery + CHT + RT vs Surgery + RT |  |  | 0.39 (0.09-1.65) | 0.20 |
|  | CHT + RT (no surgery) vs Surgery + RT |  |  | 1.84(1.06-3.22) | 0.031 |

HRs derived from univariate Cox proportional hazards models.

‡ Global likelihood ratio test for multilevel variable.
